# Supplementary material
Source: PubMed Central journal article supplement (PMC5423126)
Supplement: MOL2-10-1516-s008.pdf [file MOL2-10-1516-s008.pdf]

| <b>Positive PD-L1 expression</b> |          |              |               |
|----------------------------------|----------|--------------|---------------|
| <b>Clinical Features</b>         | <b>n</b> | <b>Tumor</b> | <b>Stroma</b> |
| <b>Stage I</b>                   | 24       | 3 (12)       | 5 (21)        |
| <b>Stage II</b>                  | 19       | 7 (37)       | 11 (58)       |
| <b>Stage III</b>                 | 21       | 14 (67)      | 17 (81)       |
| <b>Stage IV</b>                  | 32       | 27 (91)      | 31 (97)       |
| <b>Chemoresistant</b>            | 51       | 44 (86)      | 37 (73)       |
| <b>Chemosensitive</b>            | 45       | 19 (43)      | 22 (48)       |
| <b>Metastatic</b>                | 47       | 35 (74)      | 31(66)        |
| <b>Non-metastatic</b>            | 49       | 17 (35)      | 12 (24)       |

**Table S7.** Proportion of positive PD-L1 protein expression in lung cancer patients as determined by immunohistochemical analysis. Numbers in parenthesis indicate percentiles (%) in the total population of patients.
